# Supplementary material for: Comparison of oxidation in uni-directionally and randomly oriented Cu films for low temperature Cu-to-Cu direct bonding
Source: PubMed Central journal article supplement (PMC6045573; doi:10.1038/s41598-018-28812-0), 2018-07-13
Supplement: 41598_2018_28812_MOESM1_ESM.pdf [file 41598_2018_28812_MOESM1_ESM.pdf]

## Supplementary information

Ref.: SREP-18-02297

“Comparison of oxidation in uni-directionally and randomly oriented Cu films for low-temperature Cu-to-Cu direct bonding” by Chih-Han Tseng<sup>1</sup>, K. N. Tu<sup>2,3</sup> and Chih Chen<sup>1</sup>

### XPS Raw data for Figure 9a: (111) nt-Cu.

| XY | * | X Value   | Y Value   | Y Predict | Residual  | Residual% | 95% Confidence Limits | 95% Prediction Limits | Weights |
|----|---|-----------|-----------|-----------|-----------|-----------|-----------------------|-----------------------|---------|
| 1  |   | 916.30000 | 2.16e+05  | 2.152e+05 | 761.57260 | 0.3526093 | 2.105e+05 2.199e+05   | 2.08e+05 2.224e+05    | 1       |
| 2  |   | 916.55000 | 2.163e+05 | 2.154e+05 | 896.13571 | 0.4143041 | 2.124e+05 2.184e+05   | 2.091e+05 2.217e+05   | 1       |
| 3  |   | 916.80000 | 2.164e+05 | 2.153e+05 | 1035.5056 | 0.4786208 | 2.124e+05 2.182e+05   | 2.091e+05 2.215e+05   | 1       |
| 4  |   | 917.05000 | 2.163e+05 | 2.151e+05 | 1104.9080 | 0.5109307 | 2.121e+05 2.182e+05   | 2.089e+05 2.214e+05   | 1       |
| 5  |   | 917.30000 | 2.159e+05 | 2.151e+05 | 770.15090 | 0.3567925 | 2.123e+05 2.179e+05   | 2.089e+05 2.213e+05   | 1       |
| 6  |   | 917.55000 | 2.159e+05 | 2.152e+05 | 669.19843 | 0.3099375 | 2.127e+05 2.178e+05   | 2.092e+05 2.213e+05   | 1       |
| 7  |   | 917.80000 | 2.158e+05 | 2.157e+05 | 120.94149 | 0.0560475 | 2.13e+05 2.183e+05    | 2.095e+05 2.218e+05   | 1       |
| 8  |   | 918.05000 | 2.174e+05 | 2.163e+05 | 1129.2447 | 0.5194198 | 2.134e+05 2.191e+05   | 2.101e+05 2.225e+05   | 1       |
| 9  |   | 918.30000 | 2.178e+05 | 2.17e+05  | 881.46645 | 0.4046412 | 2.142e+05 2.197e+05   | 2.108e+05 2.231e+05   | 1       |
| 10 |   | 918.55000 | 2.186e+05 | 2.176e+05 | 995.79954 | 0.4556017 | 2.15e+05 2.201e+05    | 2.115e+05 2.237e+05   | 1       |
| 11 |   | 918.80000 | 2.186e+05 | 2.18e+05  | 599.26787 | 0.2741089 | 2.154e+05 2.207e+05   | 2.119e+05 2.241e+05   | 1       |
| 12 |   | 919.05000 | 2.187e+05 | 2.183e+05 | 396.03409 | 0.1810938 | 2.155e+05 2.211e+05   | 2.121e+05 2.245e+05   | 1       |
| 13 |   | 919.30000 | 2.193e+05 | 2.184e+05 | 847.72848 | 0.3865928 | 2.157e+05 2.212e+05   | 2.123e+05 2.246e+05   | 1       |
| 14 |   | 919.55000 | 2.192e+05 | 2.185e+05 | 637.88185 | 0.2910244 | 2.159e+05 2.212e+05   | 2.125e+05 2.246e+05   | 1       |
| 15 |   | 919.80000 | 2.195e+05 | 2.187e+05 | 802.45372 | 0.3655193 | 2.161e+05 2.214e+05   | 2.126e+05 2.248e+05   | 1       |
| 16 |   | 920.05000 | 2.194e+05 | 2.191e+05 | 372.07970 | 0.1695642 | 2.163e+05 2.218e+05   | 2.129e+05 2.252e+05   | 1       |
| 17 |   | 920.30000 | 2.195e+05 | 2.195e+05 | -1.245461 | -0.000567 | 2.167e+05 2.223e+05   | 2.133e+05 2.257e+05   | 1       |
| 18 |   | 920.55000 | 2.21e+05  | 2.2e+05   | 972.08486 | 0.4398236 | 2.174e+05 2.227e+05   | 2.139e+05 2.262e+05   | 1       |
| 19 |   | 920.80000 | 2.212e+05 | 2.205e+05 | 692.42808 | 0.3129901 | 2.179e+05 2.232e+05   | 2.144e+05 2.267e+05   | 1       |
| 20 |   | 921.05000 | 2.214e+05 | 2.209e+05 | 496.42326 | 0.2242251 | 2.181e+05 2.237e+05   | 2.147e+05 2.271e+05   | 1       |
| 21 |   | 921.30000 | 2.217e+05 | 2.211e+05 | 660.56617 | 0.2979254 | 2.182e+05 2.239e+05   | 2.149e+05 2.273e+05   | 1       |
| 22 |   | 921.55000 | 2.216e+05 | 2.21e+05  | 578.27263 | 0.2609722 | 2.183e+05 2.237e+05   | 2.149e+05 2.271e+05   | 1       |
| 23 |   | 921.80000 | 2.211e+05 | 2.208e+05 | 373.74739 | 0.1690193 | 2.181e+05 2.234e+05   | 2.146e+05 2.269e+05   | 1       |
| 24 |   | 922.05000 | 2.204e+05 | 2.204e+05 | 94.037219 | 0.0426575 | 2.176e+05 2.231e+05   | 2.142e+05 2.265e+05   | 1       |
| 25 |   | 922.30000 | 2.195e+05 | 2.199e+05 | -316.2640 | -0.144052 | 2.17e+05 2.227e+05    | 2.137e+05 2.261e+05   | 1       |
| 26 |   | 922.55000 | 2.201e+05 | 2.193e+05 | 739.45628 | 0.3359867 | 2.167e+05 2.22e+05    | 2.132e+05 2.255e+05   | 1       |
| 27 |   | 922.80000 | 2.198e+05 | 2.188e+05 | 996.69690 | 0.4533614 | 2.162e+05 2.215e+05   | 2.127e+05 2.25e+05    | 1       |
| 28 |   | 923.05000 | 2.19e+05  | 2.184e+05 | 577.24558 | 0.2635849 | 2.157e+05 2.212e+05   | 2.123e+05 2.246e+05   | 1       |
| 29 |   | 923.30000 | 2.186e+05 | 2.181e+05 | 527.23507 | 0.2411618 | 2.153e+05 2.209e+05   | 2.119e+05 2.243e+05   | 1       |
| 30 |   | 923.55000 | 2.178e+05 | 2.179e+05 | -65.42823 | -0.030036 | 2.152e+05 2.206e+05   | 2.118e+05 2.24e+05    | 1       |

|    |           |           |           |           |           |           |           |           |           |   |
|----|-----------|-----------|-----------|-----------|-----------|-----------|-----------|-----------|-----------|---|
| 31 | 923.80000 | 2.174e+05 | 2.178e+05 | -431.0197 | -0.198266 | 2.153e+05 | 2.204e+05 | 2.117e+05 | 2.239e+05 | 1 |
| 32 | 924.05000 | 2.182e+05 | 2.179e+05 | 325.98413 | 0.1494017 | 2.152e+05 | 2.205e+05 | 2.117e+05 | 2.24e+05  | 1 |
| 33 | 924.30000 | 2.183e+05 | 2.18e+05  | 279.01863 | 0.1278354 | 2.152e+05 | 2.207e+05 | 2.118e+05 | 2.241e+05 | 1 |
| 34 | 924.55000 | 2.182e+05 | 2.181e+05 | 32.842382 | 0.0150535 | 2.155e+05 | 2.208e+05 | 2.12e+05  | 2.243e+05 | 1 |
| 35 | 924.80000 | 2.188e+05 | 2.183e+05 | 519.52724 | 0.2374341 | 2.158e+05 | 2.208e+05 | 2.122e+05 | 2.244e+05 | 1 |
| 36 | 925.05000 | 2.191e+05 | 2.184e+05 | 715.70579 | 0.3266094 | 2.158e+05 | 2.21e+05  | 2.123e+05 | 2.245e+05 | 1 |
| 37 | 925.30000 | 2.188e+05 | 2.185e+05 | 236.72859 | 0.1082183 | 2.158e+05 | 2.212e+05 | 2.124e+05 | 2.246e+05 | 1 |
| 38 | 925.55000 | 2.186e+05 | 2.186e+05 | 15.621883 | 0.0071460 | 2.159e+05 | 2.213e+05 | 2.125e+05 | 2.247e+05 | 1 |
| 39 | 925.80000 | 2.185e+05 | 2.187e+05 | -200.2247 | -0.091647 | 2.162e+05 | 2.212e+05 | 2.126e+05 | 2.247e+05 | 1 |
| 40 | 926.05000 | 2.189e+05 | 2.188e+05 | 152.58350 | 0.0696961 | 2.164e+05 | 2.212e+05 | 2.128e+05 | 2.248e+05 | 1 |
| 41 | 926.30000 | 2.185e+05 | 2.189e+05 | -443.5592 | -0.203040 | 2.164e+05 | 2.214e+05 | 2.128e+05 | 2.25e+05  | 1 |
| 42 | 926.55000 | 2.188e+05 | 2.191e+05 | -243.8635 | -0.111446 | 2.165e+05 | 2.217e+05 | 2.13e+05  | 2.252e+05 | 1 |
| 43 | 926.80000 | 2.191e+05 | 2.192e+05 | -113.2640 | -0.051687 | 2.167e+05 | 2.218e+05 | 2.132e+05 | 2.253e+05 | 1 |
| 44 | 927.05000 | 2.198e+05 | 2.195e+05 | 375.35800 | 0.1707430 | 2.171e+05 | 2.218e+05 | 2.135e+05 | 2.255e+05 | 1 |
| 45 | 927.30000 | 2.196e+05 | 2.197e+05 | -60.69427 | -0.027633 | 2.174e+05 | 2.22e+05  | 2.138e+05 | 2.257e+05 | 1 |
| 46 | 927.55000 | 2.202e+05 | 2.2e+05   | 170.01341 | 0.0772149 | 2.177e+05 | 2.224e+05 | 2.14e+05  | 2.26e+05  | 1 |
| 47 | 927.80000 | 2.209e+05 | 2.204e+05 | 430.11331 | 0.1947483 | 2.18e+05  | 2.228e+05 | 2.144e+05 | 2.264e+05 | 1 |
| 48 | 928.05000 | 2.218e+05 | 2.21e+05  | 753.77833 | 0.3398460 | 2.187e+05 | 2.234e+05 | 2.151e+05 | 2.27e+05  | 1 |
| 49 | 928.30000 | 2.23e+05  | 2.22e+05  | 947.32308 | 0.4248581 | 2.199e+05 | 2.241e+05 | 2.161e+05 | 2.279e+05 | 1 |
| 50 | 928.55000 | 2.239e+05 | 2.236e+05 | 327.05475 | 0.1460601 | 2.218e+05 | 2.254e+05 | 2.178e+05 | 2.294e+05 | 1 |
| 51 | 928.80000 | 2.251e+05 | 2.26e+05  | -943.5640 | -0.419198 | 2.245e+05 | 2.276e+05 | 2.203e+05 | 2.317e+05 | 1 |
| 52 | 929.05000 | 2.273e+05 | 2.297e+05 | -2367.996 | -1.041729 | 2.281e+05 | 2.312e+05 | 2.24e+05  | 2.354e+05 | 1 |
| 53 | 929.30000 | 2.311e+05 | 2.349e+05 | -3744.679 | -1.620330 | 2.331e+05 | 2.366e+05 | 2.291e+05 | 2.406e+05 | 1 |
| 54 | 929.55000 | 2.355e+05 | 2.417e+05 | -6168.670 | -2.618859 | 2.396e+05 | 2.438e+05 | 2.358e+05 | 2.476e+05 | 1 |
| 55 | 929.80000 | 2.441e+05 | 2.502e+05 | -6104.627 | -2.500861 | 2.479e+05 | 2.525e+05 | 2.442e+05 | 2.562e+05 | 1 |
| 56 | 930.05000 | 2.566e+05 | 2.599e+05 | -3295.972 | -1.284529 | 2.576e+05 | 2.622e+05 | 2.539e+05 | 2.659e+05 | 1 |
| 57 | 930.30000 | 2.704e+05 | 2.699e+05 | 417.59059 | 0.1544607 | 2.677e+05 | 2.722e+05 | 2.64e+05  | 2.759e+05 | 1 |
| 58 | 930.55000 | 2.846e+05 | 2.792e+05 | 5415.8732 | 1.9026964 | 2.77e+05  | 2.815e+05 | 2.733e+05 | 2.852e+05 | 1 |
| 59 | 930.80000 | 2.935e+05 | 2.865e+05 | 6951.5966 | 2.3687911 | 2.842e+05 | 2.888e+05 | 2.805e+05 | 2.925e+05 | 1 |
| 60 | 931.05000 | 2.957e+05 | 2.907e+05 | 4936.6659 | 1.6696879 | 2.883e+05 | 2.931e+05 | 2.847e+05 | 2.967e+05 | 1 |
| 61 | 931.30000 | 2.909e+05 | 2.912e+05 | -366.2556 | -0.125921 | 2.888e+05 | 2.936e+05 | 2.852e+05 | 2.972e+05 | 1 |
| 62 | 931.55000 | 2.844e+05 | 2.88e+05  | -3557.323 | -1.250680 | 2.857e+05 | 2.903e+05 | 2.82e+05  | 2.94e+05  | 1 |
| 63 | 931.80000 | 2.75e+05  | 2.816e+05 | -6575.338 | -2.390867 | 2.793e+05 | 2.838e+05 | 2.756e+05 | 2.875e+05 | 1 |
| 64 | 932.05000 | 2.679e+05 | 2.731e+05 | -5152.861 | -1.923154 | 2.708e+05 | 2.753e+05 | 2.671e+05 | 2.79e+05  | 1 |
| 65 | 932.30000 | 2.604e+05 | 2.637e+05 | -3267.971 | -1.254755 | 2.614e+05 | 2.66e+05  | 2.577e+05 | 2.697e+05 | 1 |
| 66 | 932.55000 | 2.536e+05 | 2.546e+05 | -1026.125 | -0.404639 | 2.523e+05 | 2.569e+05 | 2.487e+05 | 2.606e+05 | 1 |
| 67 | 932.80000 | 2.485e+05 | 2.466e+05 | 1844.9922 | 0.7424755 | 2.445e+05 | 2.488e+05 | 2.407e+05 | 2.525e+05 | 1 |
| 68 | 933.05000 | 2.439e+05 | 2.403e+05 | 3609.8927 | 1.4801800 | 2.384e+05 | 2.421e+05 | 2.345e+05 | 2.461e+05 | 1 |
| 69 | 933.30000 | 2.404e+05 | 2.356e+05 | 4774.5314 | 1.9863589 | 2.341e+05 | 2.371e+05 | 2.299e+05 | 2.413e+05 | 1 |

|     |           |           |           |           |           |           |           |           |           |   |
|-----|-----------|-----------|-----------|-----------|-----------|-----------|-----------|-----------|-----------|---|
| 70  | 933.55000 | 2.369e+05 | 2.324e+05 | 4485.4612 | 1.8931908 | 2.313e+05 | 2.336e+05 | 2.268e+05 | 2.381e+05 | 1 |
| 71  | 933.80000 | 2.345e+05 | 2.305e+05 | 3948.1550 | 1.6839139 | 2.295e+05 | 2.315e+05 | 2.249e+05 | 2.361e+05 | 1 |
| 72  | 934.05000 | 2.329e+05 | 2.295e+05 | 3418.0044 | 1.4676098 | 2.286e+05 | 2.304e+05 | 2.239e+05 | 2.351e+05 | 1 |
| 73  | 934.30000 | 2.324e+05 | 2.29e+05  | 3410.9792 | 1.4674476 | 2.282e+05 | 2.299e+05 | 2.235e+05 | 2.346e+05 | 1 |
| 74  | 934.55000 | 2.311e+05 | 2.289e+05 | 2136.3881 | 0.9245031 | 2.281e+05 | 2.298e+05 | 2.234e+05 | 2.345e+05 | 1 |
| 75  | 934.80000 | 2.305e+05 | 2.291e+05 | 1419.4430 | 0.6158344 | 2.282e+05 | 2.3e+05   | 2.235e+05 | 2.347e+05 | 1 |
| 76  | 935.05000 | 2.294e+05 | 2.293e+05 | 97.187013 | 0.0423656 | 2.284e+05 | 2.302e+05 | 2.237e+05 | 2.349e+05 | 1 |
| 77  | 935.30000 | 2.293e+05 | 2.296e+05 | -250.0986 | -0.109051 | 2.287e+05 | 2.305e+05 | 2.24e+05  | 2.352e+05 | 1 |
| 78  | 935.55000 | 2.301e+05 | 2.299e+05 | 217.64980 | 0.0945814 | 2.29e+05  | 2.308e+05 | 2.243e+05 | 2.355e+05 | 1 |
| 79  | 935.80000 | 2.292e+05 | 2.302e+05 | -982.4027 | -0.428546 | 2.293e+05 | 2.311e+05 | 2.246e+05 | 2.358e+05 | 1 |
| 80  | 936.05000 | 2.298e+05 | 2.305e+05 | -741.8352 | -0.322807 | 2.297e+05 | 2.314e+05 | 2.25e+05  | 2.361e+05 | 1 |
| 81  | 936.30000 | 2.296e+05 | 2.309e+05 | -1229.934 | -0.535574 | 2.3e+05   | 2.318e+05 | 2.253e+05 | 2.365e+05 | 1 |
| 82  | 936.55000 | 2.295e+05 | 2.312e+05 | -1734.629 | -0.755922 | 2.303e+05 | 2.321e+05 | 2.256e+05 | 2.368e+05 | 1 |
| 83  | 936.80000 | 2.289e+05 | 2.315e+05 | -2624.523 | -1.146526 | 2.307e+05 | 2.324e+05 | 2.26e+05  | 2.371e+05 | 1 |
| 84  | 937.05000 | 2.292e+05 | 2.319e+05 | -2622.480 | -1.143979 | 2.31e+05  | 2.327e+05 | 2.263e+05 | 2.374e+05 | 1 |
| 85  | 937.30000 | 2.293e+05 | 2.322e+05 | -2934.457 | -1.279974 | 2.314e+05 | 2.33e+05  | 2.266e+05 | 2.378e+05 | 1 |
| 86  | 937.55000 | 2.301e+05 | 2.325e+05 | -2442.438 | -1.061560 | 2.317e+05 | 2.334e+05 | 2.27e+05  | 2.381e+05 | 1 |
| 87  | 937.80000 | 2.308e+05 | 2.329e+05 | -2036.421 | -0.882274 | 2.32e+05  | 2.337e+05 | 2.273e+05 | 2.384e+05 | 1 |
| 88  | 938.05000 | 2.305e+05 | 2.332e+05 | -2654.404 | -1.151455 | 2.324e+05 | 2.34e+05  | 2.276e+05 | 2.387e+05 | 1 |
| 89  | 938.30000 | 2.309e+05 | 2.335e+05 | -2628.387 | -1.138416 | 2.327e+05 | 2.343e+05 | 2.279e+05 | 2.391e+05 | 1 |
| 90  | 938.55000 | 2.318e+05 | 2.338e+05 | -2031.370 | -0.876320 | 2.33e+05  | 2.346e+05 | 2.283e+05 | 2.394e+05 | 1 |
| 91  | 938.80000 | 2.318e+05 | 2.342e+05 | -2362.353 | -1.019112 | 2.334e+05 | 2.349e+05 | 2.286e+05 | 2.397e+05 | 1 |
| 92  | 939.05000 | 2.32e+05  | 2.345e+05 | -2510.336 | -1.082107 | 2.337e+05 | 2.353e+05 | 2.289e+05 | 2.401e+05 | 1 |
| 93  | 939.30000 | 2.324e+05 | 2.348e+05 | -2446.320 | -1.052728 | 2.341e+05 | 2.356e+05 | 2.293e+05 | 2.404e+05 | 1 |
| 94  | 939.55000 | 2.33e+05  | 2.352e+05 | -2169.303 | -0.931091 | 2.344e+05 | 2.359e+05 | 2.296e+05 | 2.407e+05 | 1 |
| 95  | 939.80000 | 2.326e+05 | 2.355e+05 | -2875.286 | -1.236108 | 2.347e+05 | 2.362e+05 | 2.299e+05 | 2.41e+05  | 1 |
| 96  | 940.05000 | 2.33e+05  | 2.358e+05 | -2794.269 | -1.199164 | 2.351e+05 | 2.365e+05 | 2.303e+05 | 2.414e+05 | 1 |
| 97  | 940.30000 | 2.337e+05 | 2.361e+05 | -2479.252 | -1.061042 | 2.354e+05 | 2.369e+05 | 2.306e+05 | 2.417e+05 | 1 |
| 98  | 940.55000 | 2.342e+05 | 2.365e+05 | -2222.235 | -0.948668 | 2.358e+05 | 2.372e+05 | 2.309e+05 | 2.42e+05  | 1 |
| 99  | 940.80000 | 2.351e+05 | 2.368e+05 | -1706.219 | -0.725763 | 2.361e+05 | 2.375e+05 | 2.312e+05 | 2.424e+05 | 1 |
| 100 | 941.05000 | 2.35e+05  | 2.371e+05 | -2143.202 | -0.912059 | 2.364e+05 | 2.378e+05 | 2.316e+05 | 2.427e+05 | 1 |
| 101 | 941.30000 | 2.361e+05 | 2.375e+05 | -1396.185 | -0.591451 | 2.368e+05 | 2.381e+05 | 2.319e+05 | 2.43e+05  | 1 |
| 102 | 941.55000 | 2.365e+05 | 2.378e+05 | -1260.168 | -0.532782 | 2.371e+05 | 2.385e+05 | 2.322e+05 | 2.433e+05 | 1 |
| 103 | 941.80000 | 2.368e+05 | 2.381e+05 | -1318.151 | -0.556659 | 2.374e+05 | 2.388e+05 | 2.326e+05 | 2.437e+05 | 1 |
| 104 | 942.05000 | 2.369e+05 | 2.384e+05 | -1497.135 | -0.631844 | 2.378e+05 | 2.391e+05 | 2.329e+05 | 2.44e+05  | 1 |
| 105 | 942.30000 | 2.373e+05 | 2.388e+05 | -1476.118 | -0.622055 | 2.381e+05 | 2.394e+05 | 2.332e+05 | 2.443e+05 | 1 |
| 106 | 942.55000 | 2.381e+05 | 2.391e+05 | -966.1009 | -0.405693 | 2.385e+05 | 2.398e+05 | 2.336e+05 | 2.447e+05 | 1 |
| 107 | 942.80000 | 2.386e+05 | 2.394e+05 | -858.0840 | -0.359674 | 2.388e+05 | 2.401e+05 | 2.339e+05 | 2.45e+05  | 1 |
| 108 | 943.05000 | 2.385e+05 | 2.398e+05 | -1250.067 | -0.524115 | 2.391e+05 | 2.404e+05 | 2.342e+05 | 2.453e+05 | 1 |

|     |           |           |           |           |           |           |           |           |           |   |
|-----|-----------|-----------|-----------|-----------|-----------|-----------|-----------|-----------|-----------|---|
| 109 | 943.30000 | 2.387e+05 | 2.401e+05 | -1432.050 | -0.600045 | 2.395e+05 | 2.407e+05 | 2.345e+05 | 2.456e+05 | 1 |
| 110 | 943.55000 | 2.384e+05 | 2.404e+05 | -2021.034 | -0.847760 | 2.398e+05 | 2.41e+05  | 2.349e+05 | 2.46e+05  | 1 |
| 111 | 943.80000 | 2.395e+05 | 2.407e+05 | -1231.017 | -0.513960 | 2.401e+05 | 2.414e+05 | 2.352e+05 | 2.463e+05 | 1 |
| 112 | 944.05000 | 2.4e+05   | 2.411e+05 | -1084.000 | -0.451682 | 2.405e+05 | 2.417e+05 | 2.355e+05 | 2.466e+05 | 1 |
| 113 | 944.30000 | 2.4e+05   | 2.414e+05 | -1393.983 | -0.580800 | 2.408e+05 | 2.42e+05  | 2.359e+05 | 2.469e+05 | 1 |
| 114 | 944.55000 | 2.401e+05 | 2.417e+05 | -1627.966 | -0.678020 | 2.411e+05 | 2.423e+05 | 2.362e+05 | 2.473e+05 | 1 |
| 115 | 944.80000 | 2.406e+05 | 2.421e+05 | -1491.950 | -0.620170 | 2.415e+05 | 2.427e+05 | 2.365e+05 | 2.476e+05 | 1 |
| 116 | 945.05000 | 2.403e+05 | 2.424e+05 | -2096.935 | -0.872650 | 2.418e+05 | 2.43e+05  | 2.369e+05 | 2.479e+05 | 1 |
| 117 | 945.30000 | 2.408e+05 | 2.427e+05 | -1937.925 | -0.804843 | 2.421e+05 | 2.433e+05 | 2.372e+05 | 2.483e+05 | 1 |
| 118 | 945.55000 | 2.413e+05 | 2.43e+05  | -1750.932 | -0.725628 | 2.425e+05 | 2.436e+05 | 2.375e+05 | 2.486e+05 | 1 |
| 119 | 945.80000 | 2.426e+05 | 2.434e+05 | -741.9959 | -0.305805 | 2.428e+05 | 2.44e+05  | 2.378e+05 | 2.489e+05 | 1 |
| 120 | 946.05000 | 2.425e+05 | 2.437e+05 | -1228.231 | -0.506529 | 2.431e+05 | 2.443e+05 | 2.382e+05 | 2.492e+05 | 1 |
| 121 | 946.30000 | 2.419e+05 | 2.44e+05  | -2138.960 | -0.884237 | 2.435e+05 | 2.446e+05 | 2.385e+05 | 2.496e+05 | 1 |
| 122 | 946.55000 | 2.424e+05 | 2.444e+05 | -2012.019 | -0.830188 | 2.438e+05 | 2.449e+05 | 2.388e+05 | 2.499e+05 | 1 |
| 123 | 946.80000 | 2.427e+05 | 2.447e+05 | -2010.449 | -0.828392 | 2.442e+05 | 2.453e+05 | 2.392e+05 | 2.502e+05 | 1 |
| 124 | 947.05000 | 2.436e+05 | 2.45e+05  | -1486.880 | -0.610480 | 2.445e+05 | 2.456e+05 | 2.395e+05 | 2.506e+05 | 1 |
| 125 | 947.30000 | 2.436e+05 | 2.454e+05 | -1776.108 | -0.729019 | 2.449e+05 | 2.459e+05 | 2.399e+05 | 2.509e+05 | 1 |
| 126 | 947.55000 | 2.439e+05 | 2.458e+05 | -1949.367 | -0.799399 | 2.453e+05 | 2.463e+05 | 2.403e+05 | 2.513e+05 | 1 |
| 127 | 947.80000 | 2.447e+05 | 2.463e+05 | -1525.577 | -0.623328 | 2.458e+05 | 2.468e+05 | 2.407e+05 | 2.518e+05 | 1 |
| 128 | 948.05000 | 2.456e+05 | 2.469e+05 | -1276.060 | -0.519577 | 2.464e+05 | 2.474e+05 | 2.413e+05 | 2.524e+05 | 1 |
| 129 | 948.30000 | 2.464e+05 | 2.477e+05 | -1337.656 | -0.542983 | 2.471e+05 | 2.483e+05 | 2.422e+05 | 2.532e+05 | 1 |
| 130 | 948.55000 | 2.476e+05 | 2.489e+05 | -1210.191 | -0.488690 | 2.482e+05 | 2.495e+05 | 2.433e+05 | 2.544e+05 | 1 |
| 131 | 948.80000 | 2.486e+05 | 2.505e+05 | -1869.502 | -0.751927 | 2.496e+05 | 2.514e+05 | 2.449e+05 | 2.561e+05 | 1 |
| 132 | 949.05000 | 2.514e+05 | 2.528e+05 | -1360.398 | -0.541086 | 2.516e+05 | 2.54e+05  | 2.471e+05 | 2.584e+05 | 1 |
| 133 | 949.30000 | 2.543e+05 | 2.558e+05 | -1488.521 | -0.585301 | 2.543e+05 | 2.573e+05 | 2.501e+05 | 2.615e+05 | 1 |
| 134 | 949.55000 | 2.578e+05 | 2.596e+05 | -1827.625 | -0.709052 | 2.578e+05 | 2.614e+05 | 2.538e+05 | 2.654e+05 | 1 |
| 135 | 949.80000 | 2.621e+05 | 2.64e+05  | -1835.361 | -0.700140 | 2.619e+05 | 2.66e+05  | 2.581e+05 | 2.699e+05 | 1 |
| 136 | 950.05000 | 2.679e+05 | 2.687e+05 | -775.7650 | -0.289575 | 2.665e+05 | 2.709e+05 | 2.627e+05 | 2.746e+05 | 1 |
| 137 | 950.30000 | 2.724e+05 | 2.732e+05 | -851.6709 | -0.312711 | 2.71e+05  | 2.754e+05 | 2.673e+05 | 2.791e+05 | 1 |
| 138 | 950.55000 | 2.762e+05 | 2.77e+05  | -777.1180 | -0.281327 | 2.748e+05 | 2.792e+05 | 2.711e+05 | 2.829e+05 | 1 |
| 139 | 950.80000 | 2.785e+05 | 2.796e+05 | -1112.001 | -0.399335 | 2.774e+05 | 2.817e+05 | 2.737e+05 | 2.855e+05 | 1 |
| 140 | 951.05000 | 2.775e+05 | 2.805e+05 | -3079.345 | -1.109846 | 2.784e+05 | 2.827e+05 | 2.746e+05 | 2.864e+05 | 1 |
| 141 | 951.30000 | 2.756e+05 | 2.798e+05 | -4141.644 | -1.502517 | 2.776e+05 | 2.819e+05 | 2.739e+05 | 2.857e+05 | 1 |
| 142 | 951.55000 | 2.732e+05 | 2.775e+05 | -4328.655 | -1.584531 | 2.753e+05 | 2.797e+05 | 2.716e+05 | 2.834e+05 | 1 |
| 143 | 951.80000 | 2.701e+05 | 2.741e+05 | -4003.849 | -1.482287 | 2.719e+05 | 2.763e+05 | 2.682e+05 | 2.801e+05 | 1 |
| 144 | 952.05000 | 2.672e+05 | 2.701e+05 | -2914.638 | -1.090665 | 2.68e+05  | 2.723e+05 | 2.642e+05 | 2.761e+05 | 1 |
| 145 | 952.30000 | 2.641e+05 | 2.662e+05 | -2038.889 | -0.771979 | 2.642e+05 | 2.682e+05 | 2.603e+05 | 2.72e+05  | 1 |
| 146 | 952.55000 | 2.626e+05 | 2.626e+05 | 1.7550642 | 0.0006685 | 2.608e+05 | 2.643e+05 | 2.568e+05 | 2.683e+05 | 1 |
| 147 | 952.80000 | 2.609e+05 | 2.596e+05 | 1315.9927 | 0.5043239 | 2.582e+05 | 2.611e+05 | 2.539e+05 | 2.653e+05 | 1 |

|     |           |           |           |           |           |           |           |           |           |   |
|-----|-----------|-----------|-----------|-----------|-----------|-----------|-----------|-----------|-----------|---|
| 148 | 953.05000 | 2.594e+05 | 2.575e+05 | 1922.6002 | 0.7412206 | 2.563e+05 | 2.586e+05 | 2.518e+05 | 2.631e+05 | 1 |
| 149 | 953.30000 | 2.583e+05 | 2.56e+05  | 2329.1225 | 0.9015551 | 2.551e+05 | 2.569e+05 | 2.504e+05 | 2.616e+05 | 1 |
| 150 | 953.55000 | 2.573e+05 | 2.552e+05 | 2085.0357 | 0.8104937 | 2.545e+05 | 2.559e+05 | 2.496e+05 | 2.607e+05 | 1 |
| 151 | 953.80000 | 2.566e+05 | 2.548e+05 | 1784.2654 | 0.6954682 | 2.542e+05 | 2.554e+05 | 2.492e+05 | 2.603e+05 | 1 |
| 152 | 954.05000 | 2.555e+05 | 2.547e+05 | 804.65427 | 0.3149529 | 2.541e+05 | 2.552e+05 | 2.491e+05 | 2.602e+05 | 1 |
| 153 | 954.30000 | 2.544e+05 | 2.548e+05 | -329.4272 | -0.129466 | 2.542e+05 | 2.553e+05 | 2.492e+05 | 2.603e+05 | 1 |
| 154 | 954.55000 | 2.546e+05 | 2.55e+05  | -397.7019 | -0.156210 | 2.544e+05 | 2.556e+05 | 2.495e+05 | 2.605e+05 | 1 |
| 155 | 954.80000 | 2.549e+05 | 2.553e+05 | -373.7849 | -0.146645 | 2.547e+05 | 2.558e+05 | 2.497e+05 | 2.608e+05 | 1 |
| 156 | 955.05000 | 2.547e+05 | 2.556e+05 | -910.5978 | -0.357577 | 2.55e+05  | 2.562e+05 | 2.5e+05   | 2.611e+05 | 1 |
| 157 | 955.30000 | 2.544e+05 | 2.559e+05 | -1484.920 | -0.583691 | 2.553e+05 | 2.565e+05 | 2.503e+05 | 2.614e+05 | 1 |
| 158 | 955.55000 | 2.548e+05 | 2.562e+05 | -1448.654 | -0.568628 | 2.556e+05 | 2.568e+05 | 2.507e+05 | 2.618e+05 | 1 |
| 159 | 955.80000 | 2.544e+05 | 2.565e+05 | -2147.043 | -0.843990 | 2.559e+05 | 2.571e+05 | 2.51e+05  | 2.621e+05 | 1 |
| 160 | 956.05000 | 2.545e+05 | 2.569e+05 | -2397.463 | -0.942140 | 2.563e+05 | 2.575e+05 | 2.513e+05 | 2.624e+05 | 1 |
| 161 | 956.30000 | 2.544e+05 | 2.572e+05 | -2795.258 | -1.098761 | 2.566e+05 | 2.578e+05 | 2.517e+05 | 2.627e+05 | 1 |
| 162 | 956.55000 | 2.54e+05  | 2.575e+05 | -3544.183 | -1.395452 | 2.569e+05 | 2.582e+05 | 2.52e+05  | 2.631e+05 | 1 |
| 163 | 956.80000 | 2.55e+05  | 2.579e+05 | -2839.148 | -1.113326 | 2.572e+05 | 2.585e+05 | 2.523e+05 | 2.634e+05 | 1 |
| 164 | 957.05000 | 2.553e+05 | 2.582e+05 | -2890.127 | -1.132082 | 2.575e+05 | 2.588e+05 | 2.526e+05 | 2.637e+05 | 1 |
| 165 | 957.30000 | 2.558e+05 | 2.585e+05 | -2684.109 | -1.049185 | 2.579e+05 | 2.592e+05 | 2.53e+05  | 2.641e+05 | 1 |
| 166 | 957.55000 | 2.557e+05 | 2.588e+05 | -3101.092 | -1.212595 | 2.582e+05 | 2.595e+05 | 2.533e+05 | 2.644e+05 | 1 |
| 167 | 957.80000 | 2.556e+05 | 2.592e+05 | -3586.075 | -1.403090 | 2.585e+05 | 2.598e+05 | 2.536e+05 | 2.647e+05 | 1 |
| 168 | 958.05000 | 2.557e+05 | 2.595e+05 | -3778.058 | -1.477414 | 2.588e+05 | 2.602e+05 | 2.539e+05 | 2.651e+05 | 1 |
| 169 | 958.30000 | 2.553e+05 | 2.598e+05 | -4533.041 | -1.775609 | 2.591e+05 | 2.605e+05 | 2.543e+05 | 2.654e+05 | 1 |
| 170 | 958.55000 | 2.555e+05 | 2.602e+05 | -4646.024 | -1.818326 | 2.595e+05 | 2.608e+05 | 2.546e+05 | 2.657e+05 | 1 |
| 171 | 958.80000 | 2.564e+05 | 2.605e+05 | -4106.007 | -1.601532 | 2.598e+05 | 2.612e+05 | 2.549e+05 | 2.66e+05  | 1 |
| 172 | 959.05000 | 2.57e+05  | 2.608e+05 | -3769.990 | -1.466666 | 2.601e+05 | 2.615e+05 | 2.553e+05 | 2.664e+05 | 1 |
| 173 | 959.30000 | 2.569e+05 | 2.611e+05 | -4247.974 | -1.653577 | 2.604e+05 | 2.619e+05 | 2.556e+05 | 2.667e+05 | 1 |
| 174 | 959.55000 | 2.568e+05 | 2.615e+05 | -4647.957 | -1.809776 | 2.608e+05 | 2.622e+05 | 2.559e+05 | 2.67e+05  | 1 |
| 175 | 959.80000 | 2.575e+05 | 2.618e+05 | -4318.940 | -1.677369 | 2.611e+05 | 2.625e+05 | 2.562e+05 | 2.674e+05 | 1 |
| 176 | 960.05000 | 2.567e+05 | 2.621e+05 | -5403.923 | -2.104930 | 2.614e+05 | 2.629e+05 | 2.566e+05 | 2.677e+05 | 1 |
| 177 | 960.30000 | 2.575e+05 | 2.625e+05 | -4972.906 | -1.931323 | 2.617e+05 | 2.632e+05 | 2.569e+05 | 2.68e+05  | 1 |
| 178 | 960.55000 | 2.581e+05 | 2.628e+05 | -4719.890 | -1.828925 | 2.62e+05  | 2.635e+05 | 2.572e+05 | 2.684e+05 | 1 |
| 179 | 960.80000 | 2.585e+05 | 2.631e+05 | -4614.873 | -1.785230 | 2.624e+05 | 2.639e+05 | 2.576e+05 | 2.687e+05 | 1 |
| 180 | 961.05000 | 2.589e+05 | 2.634e+05 | -4585.856 | -1.771551 | 2.627e+05 | 2.642e+05 | 2.579e+05 | 2.69e+05  | 1 |
| 181 | 961.30000 | 2.591e+05 | 2.638e+05 | -4703.839 | -1.815649 | 2.63e+05  | 2.646e+05 | 2.582e+05 | 2.693e+05 | 1 |
| 182 | 961.55000 | 2.589e+05 | 2.641e+05 | -5177.822 | -1.999723 | 2.633e+05 | 2.649e+05 | 2.585e+05 | 2.697e+05 | 1 |
| 183 | 961.80000 | 2.597e+05 | 2.644e+05 | -4708.805 | -1.812997 | 2.636e+05 | 2.652e+05 | 2.589e+05 | 2.7e+05   | 1 |
| 184 | 962.05000 | 2.607e+05 | 2.648e+05 | -4052.789 | -1.554520 | 2.639e+05 | 2.656e+05 | 2.592e+05 | 2.703e+05 | 1 |
| 185 | 962.30000 | 2.611e+05 | 2.651e+05 | -3995.773 | -1.530385 | 2.643e+05 | 2.659e+05 | 2.595e+05 | 2.707e+05 | 1 |
| 186 | 962.55000 | 2.616e+05 | 2.654e+05 | -3796.759 | -1.451227 | 2.646e+05 | 2.663e+05 | 2.598e+05 | 2.71e+05  | 1 |

|     |           |           |           |           |           |           |           |           |           |   |
|-----|-----------|-----------|-----------|-----------|-----------|-----------|-----------|-----------|-----------|---|
| 187 | 962.80000 | 2.619e+05 | 2.657e+05 | -3882.751 | -1.482719 | 2.649e+05 | 2.666e+05 | 2.602e+05 | 2.713e+05 | 1 |
| 188 | 963.05000 | 2.625e+05 | 2.661e+05 | -3560.765 | -1.356389 | 2.652e+05 | 2.669e+05 | 2.605e+05 | 2.717e+05 | 1 |
| 189 | 963.30000 | 2.637e+05 | 2.664e+05 | -2711.840 | -1.028396 | 2.655e+05 | 2.673e+05 | 2.608e+05 | 2.72e+05  | 1 |
| 190 | 963.55000 | 2.64e+05  | 2.667e+05 | -2756.088 | -1.044048 | 2.659e+05 | 2.676e+05 | 2.612e+05 | 2.723e+05 | 1 |
| 191 | 963.80000 | 2.646e+05 | 2.671e+05 | -2515.784 | -0.950964 | 2.662e+05 | 2.68e+05  | 2.615e+05 | 2.726e+05 | 1 |
| 192 | 964.05000 | 2.646e+05 | 2.674e+05 | -2794.578 | -1.056140 | 2.665e+05 | 2.683e+05 | 2.618e+05 | 2.73e+05  | 1 |
| 193 | 964.30000 | 2.65e+05  | 2.677e+05 | -2770.892 | -1.045777 | 2.668e+05 | 2.686e+05 | 2.621e+05 | 2.733e+05 | 1 |
| 194 | 964.55000 | 2.655e+05 | 2.681e+05 | -2521.614 | -0.949589 | 2.672e+05 | 2.69e+05  | 2.625e+05 | 2.737e+05 | 1 |
| 195 | 964.80000 | 2.662e+05 | 2.684e+05 | -2230.191 | -0.837822 | 2.675e+05 | 2.693e+05 | 2.628e+05 | 2.74e+05  | 1 |
| 196 | 965.05000 | 2.671e+05 | 2.688e+05 | -1691.090 | -0.633135 | 2.679e+05 | 2.697e+05 | 2.632e+05 | 2.744e+05 | 1 |
| 197 | 965.30000 | 2.675e+05 | 2.692e+05 | -1707.391 | -0.638308 | 2.683e+05 | 2.701e+05 | 2.636e+05 | 2.748e+05 | 1 |
| 198 | 965.55000 | 2.677e+05 | 2.697e+05 | -1957.872 | -0.731371 | 2.687e+05 | 2.706e+05 | 2.641e+05 | 2.752e+05 | 1 |
| 199 | 965.80000 | 2.681e+05 | 2.702e+05 | -2145.555 | -0.800404 | 2.692e+05 | 2.712e+05 | 2.646e+05 | 2.758e+05 | 1 |
| 200 | 966.05000 | 2.685e+05 | 2.709e+05 | -2367.510 | -0.881751 | 2.697e+05 | 2.721e+05 | 2.652e+05 | 2.765e+05 | 1 |
| 201 | 966.30000 | 2.692e+05 | 2.717e+05 | -2472.064 | -0.918287 | 2.702e+05 | 2.731e+05 | 2.66e+05  | 2.774e+05 | 1 |
| 202 | 966.55000 | 2.703e+05 | 2.726e+05 | -2381.844 | -0.881319 | 2.709e+05 | 2.744e+05 | 2.668e+05 | 2.784e+05 | 1 |
| 203 | 966.80000 | 2.709e+05 | 2.738e+05 | -2817.893 | -1.040066 | 2.717e+05 | 2.758e+05 | 2.679e+05 | 2.796e+05 | 1 |
| 204 | 967.05000 | 2.713e+05 | 2.75e+05  | -3654.062 | -1.346812 | 2.727e+05 | 2.772e+05 | 2.69e+05  | 2.809e+05 | 1 |
| 205 | 967.30000 | 2.719e+05 | 2.762e+05 | -4308.519 | -1.584597 | 2.739e+05 | 2.785e+05 | 2.702e+05 | 2.822e+05 | 1 |
| 206 | 967.55000 | 2.736e+05 | 2.774e+05 | -3766.768 | -1.376652 | 2.751e+05 | 2.796e+05 | 2.714e+05 | 2.833e+05 | 1 |
| 207 | 967.80000 | 2.745e+05 | 2.784e+05 | -3859.656 | -1.405842 | 2.762e+05 | 2.806e+05 | 2.725e+05 | 2.843e+05 | 1 |
| 208 | 968.05000 | 2.753e+05 | 2.792e+05 | -3949.767 | -1.434943 | 2.77e+05  | 2.814e+05 | 2.733e+05 | 2.851e+05 | 1 |
| 209 | 968.30000 | 2.764e+05 | 2.798e+05 | -3362.539 | -1.216438 | 2.774e+05 | 2.822e+05 | 2.738e+05 | 2.858e+05 | 1 |
| 210 | 968.55000 | 2.767e+05 | 2.802e+05 | -3555.725 | -1.285256 | 2.777e+05 | 2.827e+05 | 2.742e+05 | 2.863e+05 | 1 |
| 211 | 968.80000 | 2.769e+05 | 2.806e+05 | -3653.532 | -1.319265 | 2.782e+05 | 2.83e+05  | 2.746e+05 | 2.866e+05 | 1 |
| 212 | 969.05000 | 2.778e+05 | 2.811e+05 | -3251.971 | -1.170569 | 2.788e+05 | 2.833e+05 | 2.751e+05 | 2.87e+05  | 1 |
| 213 | 969.30000 | 2.786e+05 | 2.817e+05 | -3169.038 | -1.137605 | 2.796e+05 | 2.839e+05 | 2.758e+05 | 2.877e+05 | 1 |
| 214 | 969.55000 | 2.809e+05 | 2.827e+05 | -1807.111 | -0.643420 | 2.804e+05 | 2.85e+05  | 2.767e+05 | 2.886e+05 | 1 |
| 215 | 969.80000 | 2.804e+05 | 2.838e+05 | -3370.813 | -1.202029 | 2.813e+05 | 2.863e+05 | 2.777e+05 | 2.899e+05 | 1 |
| 216 | 970.05000 | 2.807e+05 | 2.85e+05  | -4304.834 | -1.533650 | 2.824e+05 | 2.876e+05 | 2.789e+05 | 2.911e+05 | 1 |
| 217 | 970.30000 | 2.814e+05 | 2.861e+05 | -4672.996 | -1.660630 | 2.836e+05 | 2.886e+05 | 2.8e+05   | 2.921e+05 | 1 |
| 218 | 970.55000 | 2.825e+05 | 2.868e+05 | -4355.440 | -1.541907 | 2.845e+05 | 2.892e+05 | 2.808e+05 | 2.928e+05 | 1 |
| 219 | 970.80000 | 2.83e+05  | 2.871e+05 | -4115.084 | -1.454099 | 2.846e+05 | 2.896e+05 | 2.811e+05 | 2.932e+05 | 1 |
| 220 | 971.05000 | 2.835e+05 | 2.869e+05 | -3422.964 | -1.207578 | 2.838e+05 | 2.899e+05 | 2.806e+05 | 2.932e+05 | 1 |
| 221 | 971.30000 | 2.835e+05 | 2.862e+05 | -2625.572 | -0.925974 | 2.826e+05 | 2.898e+05 | 2.796e+05 | 2.928e+05 | 1 |

### XPS Raw data for Figure 9b: random Cu

| XY | * X Value | Y Value   | Y Predict | Residual  | Residual% | 95% Confidence Limits | 95% Prediction Limits | Weights |
|----|-----------|-----------|-----------|-----------|-----------|-----------------------|-----------------------|---------|
| 1  | 916.50000 | 2.124e+05 | 2.122e+05 | 128.43573 | 0.0604796 | 2.086e+05 2.159e+05   | 2.067e+05 2.178e+05   | 1       |
| 2  | 916.75000 | 2.121e+05 | 2.125e+05 | -395.3989 | -0.186419 | 2.102e+05 2.148e+05   | 2.077e+05 2.173e+05   | 1       |
| 3  | 917.00000 | 2.127e+05 | 2.125e+05 | 245.84775 | 0.1155642 | 2.102e+05 2.148e+05   | 2.077e+05 2.173e+05   | 1       |
| 4  | 917.25000 | 2.125e+05 | 2.124e+05 | 134.29700 | 0.0631920 | 2.1e+05 2.148e+05     | 2.075e+05 2.172e+05   | 1       |
| 5  | 917.50000 | 2.123e+05 | 2.124e+05 | -36.56719 | -0.017223 | 2.102e+05 2.145e+05   | 2.076e+05 2.171e+05   | 1       |
| 6  | 917.75000 | 2.125e+05 | 2.125e+05 | 56.314663 | 0.0264953 | 2.104e+05 2.145e+05   | 2.078e+05 2.172e+05   | 1       |
| 7  | 918.00000 | 2.129e+05 | 2.128e+05 | 101.31832 | 0.0475836 | 2.106e+05 2.15e+05    | 2.081e+05 2.176e+05   | 1       |
| 8  | 918.25000 | 2.126e+05 | 2.133e+05 | -714.6766 | -0.336173 | 2.111e+05 2.155e+05   | 2.085e+05 2.181e+05   | 1       |
| 9  | 918.50000 | 2.139e+05 | 2.138e+05 | 93.774009 | 0.0438336 | 2.118e+05 2.159e+05   | 2.091e+05 2.185e+05   | 1       |
| 10 | 918.75000 | 2.148e+05 | 2.143e+05 | 423.61176 | 0.1972535 | 2.123e+05 2.164e+05   | 2.096e+05 2.19e+05    | 1       |
| 11 | 919.00000 | 2.151e+05 | 2.147e+05 | 332.57711 | 0.1546338 | 2.126e+05 2.169e+05   | 2.1e+05 2.195e+05     | 1       |
| 12 | 919.25000 | 2.151e+05 | 2.151e+05 | -28.20348 | -0.013115 | 2.129e+05 2.173e+05   | 2.103e+05 2.198e+05   | 1       |
| 13 | 919.50000 | 2.151e+05 | 2.154e+05 | -321.9468 | -0.149680 | 2.133e+05 2.175e+05   | 2.107e+05 2.201e+05   | 1       |
| 14 | 919.75000 | 2.156e+05 | 2.158e+05 | -156.9179 | -0.072768 | 2.138e+05 2.178e+05   | 2.111e+05 2.205e+05   | 1       |
| 15 | 920.00000 | 2.16e+05  | 2.163e+05 | -312.2130 | -0.144562 | 2.141e+05 2.184e+05   | 2.115e+05 2.21e+05    | 1       |
| 16 | 920.25000 | 2.172e+05 | 2.169e+05 | 371.30792 | 0.1709285 | 2.147e+05 2.19e+05    | 2.121e+05 2.216e+05   | 1       |
| 17 | 920.50000 | 2.175e+05 | 2.175e+05 | 72.924475 | 0.0335229 | 2.154e+05 2.196e+05   | 2.128e+05 2.222e+05   | 1       |
| 18 | 920.75000 | 2.182e+05 | 2.18e+05  | 228.33806 | 0.1046285 | 2.159e+05 2.201e+05   | 2.133e+05 2.227e+05   | 1       |
| 19 | 921.00000 | 2.183e+05 | 2.184e+05 | -88.17189 | -0.040387 | 2.162e+05 2.206e+05   | 2.137e+05 2.232e+05   | 1       |
| 20 | 921.25000 | 2.188e+05 | 2.186e+05 | 174.86855 | 0.0799322 | 2.164e+05 2.208e+05   | 2.138e+05 2.233e+05   | 1       |
| 21 | 921.50000 | 2.179e+05 | 2.186e+05 | -660.1098 | -0.302954 | 2.165e+05 2.206e+05   | 2.138e+05 2.233e+05   | 1       |
| 22 | 921.75000 | 2.184e+05 | 2.183e+05 | 121.76215 | 0.0557504 | 2.162e+05 2.204e+05   | 2.136e+05 2.23e+05    | 1       |
| 23 | 922.00000 | 2.179e+05 | 2.178e+05 | 101.31267 | 0.0464874 | 2.157e+05 2.2e+05     | 2.131e+05 2.226e+05   | 1       |
| 24 | 922.25000 | 2.174e+05 | 2.173e+05 | 153.94814 | 0.0708094 | 2.151e+05 2.194e+05   | 2.125e+05 2.22e+05    | 1       |
| 25 | 922.50000 | 2.166e+05 | 2.166e+05 | -7.341484 | -0.003389 | 2.146e+05 2.187e+05   | 2.119e+05 2.213e+05   | 1       |
| 26 | 922.75000 | 2.163e+05 | 2.16e+05  | 328.10571 | 0.1516831 | 2.139e+05 2.18e+05    | 2.113e+05 2.207e+05   | 1       |
| 27 | 923.00000 | 2.152e+05 | 2.154e+05 | -176.3973 | -0.081956 | 2.133e+05 2.175e+05   | 2.107e+05 2.201e+05   | 1       |
| 28 | 923.25000 | 2.144e+05 | 2.15e+05  | -568.6415 | -0.265246 | 2.128e+05 2.171e+05   | 2.102e+05 2.197e+05   | 1       |
| 29 | 923.50000 | 2.147e+05 | 2.146e+05 | 62.953132 | 0.0293224 | 2.126e+05 2.166e+05   | 2.1e+05 2.193e+05     | 1       |
| 30 | 923.75000 | 2.149e+05 | 2.144e+05 | 436.53999 | 0.2031571 | 2.125e+05 2.164e+05   | 2.098e+05 2.191e+05   | 1       |
| 31 | 924.00000 | 2.145e+05 | 2.144e+05 | 173.83390 | 0.0810301 | 2.123e+05 2.164e+05   | 2.097e+05 2.19e+05    | 1       |
| 32 | 924.25000 | 2.142e+05 | 2.143e+05 | -95.60457 | -0.044626 | 2.122e+05 2.164e+05   | 2.096e+05 2.19e+05    | 1       |
| 33 | 924.50000 | 2.142e+05 | 2.143e+05 | -161.9845 | -0.075636 | 2.123e+05 2.163e+05   | 2.097e+05 2.19e+05    | 1       |
| 34 | 924.75000 | 2.137e+05 | 2.143e+05 | -592.3782 | -0.277174 | 2.124e+05 2.162e+05   | 2.097e+05 2.189e+05   | 1       |
| 35 | 925.00000 | 2.143e+05 | 2.143e+05 | 43.671569 | 0.0203744 | 2.124e+05 2.162e+05   | 2.097e+05 2.189e+05   | 1       |
| 36 | 925.25000 | 2.151e+05 | 2.143e+05 | 775.82984 | 0.3607018 | 2.123e+05 2.163e+05   | 2.096e+05 2.19e+05    | 1       |
| 37 | 925.50000 | 2.144e+05 | 2.144e+05 | 47.542485 | 0.0221713 | 2.124e+05 2.164e+05   | 2.097e+05 2.19e+05    | 1       |

|    |           |           |           |           |           |           |           |           |           |   |
|----|-----------|-----------|-----------|-----------|-----------|-----------|-----------|-----------|-----------|---|
| 38 | 925.75000 | 2.148e+05 | 2.146e+05 | 222.81532 | 0.1037446 | 2.127e+05 | 2.164e+05 | 2.1e+05   | 2.191e+05 | 1 |
| 39 | 926.00000 | 2.149e+05 | 2.148e+05 | 112.29557 | 0.0522468 | 2.131e+05 | 2.165e+05 | 2.103e+05 | 2.194e+05 | 1 |
| 40 | 926.25000 | 2.145e+05 | 2.152e+05 | -661.2566 | -0.308245 | 2.134e+05 | 2.169e+05 | 2.106e+05 | 2.198e+05 | 1 |
| 41 | 926.50000 | 2.152e+05 | 2.156e+05 | -435.5241 | -0.202411 | 2.137e+05 | 2.175e+05 | 2.11e+05  | 2.202e+05 | 1 |
| 42 | 926.75000 | 2.158e+05 | 2.16e+05  | -222.6819 | -0.103187 | 2.141e+05 | 2.179e+05 | 2.114e+05 | 2.207e+05 | 1 |
| 43 | 927.00000 | 2.158e+05 | 2.164e+05 | -582.9975 | -0.270131 | 2.146e+05 | 2.182e+05 | 2.118e+05 | 2.21e+05  | 1 |
| 44 | 927.25000 | 2.166e+05 | 2.167e+05 | -138.9411 | -0.064158 | 2.15e+05  | 2.184e+05 | 2.121e+05 | 2.213e+05 | 1 |
| 45 | 927.50000 | 2.178e+05 | 2.169e+05 | 887.68496 | 0.4075576 | 2.152e+05 | 2.186e+05 | 2.124e+05 | 2.215e+05 | 1 |
| 46 | 927.75000 | 2.172e+05 | 2.171e+05 | 78.149399 | 0.0359834 | 2.154e+05 | 2.188e+05 | 2.125e+05 | 2.217e+05 | 1 |
| 47 | 928.00000 | 2.182e+05 | 2.174e+05 | 879.99815 | 0.4032323 | 2.155e+05 | 2.192e+05 | 2.128e+05 | 2.22e+05  | 1 |
| 48 | 928.25000 | 2.187e+05 | 2.178e+05 | 839.28754 | 0.3838059 | 2.161e+05 | 2.196e+05 | 2.133e+05 | 2.224e+05 | 1 |
| 49 | 928.50000 | 2.197e+05 | 2.188e+05 | 946.74305 | 0.4308881 | 2.171e+05 | 2.204e+05 | 2.143e+05 | 2.233e+05 | 1 |
| 50 | 928.75000 | 2.208e+05 | 2.205e+05 | 333.42963 | 0.1510112 | 2.191e+05 | 2.219e+05 | 2.16e+05  | 2.249e+05 | 1 |
| 51 | 929.00000 | 2.225e+05 | 2.233e+05 | -815.5463 | -0.366618 | 2.22e+05  | 2.245e+05 | 2.189e+05 | 2.277e+05 | 1 |
| 52 | 929.25000 | 2.258e+05 | 2.275e+05 | -1701.542 | -0.753425 | 2.263e+05 | 2.288e+05 | 2.231e+05 | 2.32e+05  | 1 |
| 53 | 929.50000 | 2.299e+05 | 2.336e+05 | -3719.534 | -1.618146 | 2.321e+05 | 2.351e+05 | 2.291e+05 | 2.381e+05 | 1 |
| 54 | 929.75000 | 2.365e+05 | 2.415e+05 | -5002.783 | -2.115467 | 2.398e+05 | 2.432e+05 | 2.37e+05  | 2.46e+05  | 1 |
| 55 | 930.00000 | 2.451e+05 | 2.51e+05  | -5923.909 | -2.416778 | 2.493e+05 | 2.528e+05 | 2.465e+05 | 2.556e+05 | 1 |
| 56 | 930.25000 | 2.591e+05 | 2.616e+05 | -2510.811 | -0.969036 | 2.598e+05 | 2.634e+05 | 2.57e+05  | 2.662e+05 | 1 |
| 57 | 930.50000 | 2.735e+05 | 2.722e+05 | 1273.6622 | 0.4657445 | 2.705e+05 | 2.739e+05 | 2.676e+05 | 2.768e+05 | 1 |
| 58 | 930.75000 | 2.872e+05 | 2.815e+05 | 5685.9617 | 1.9799227 | 2.798e+05 | 2.832e+05 | 2.769e+05 | 2.861e+05 | 1 |
| 59 | 931.00000 | 2.952e+05 | 2.882e+05 | 7018.4296 | 2.3772269 | 2.864e+05 | 2.9e+05   | 2.836e+05 | 2.928e+05 | 1 |
| 60 | 931.25000 | 2.961e+05 | 2.913e+05 | 4777.2258 | 1.6132409 | 2.895e+05 | 2.932e+05 | 2.867e+05 | 2.96e+05  | 1 |
| 61 | 931.50000 | 2.904e+05 | 2.904e+05 | -57.26044 | -0.019720 | 2.886e+05 | 2.923e+05 | 2.858e+05 | 2.95e+05  | 1 |
| 62 | 931.75000 | 2.818e+05 | 2.856e+05 | -3864.609 | -1.371528 | 2.839e+05 | 2.874e+05 | 2.811e+05 | 2.902e+05 | 1 |
| 63 | 932.00000 | 2.723e+05 | 2.778e+05 | -5552.634 | -2.039408 | 2.761e+05 | 2.795e+05 | 2.733e+05 | 2.824e+05 | 1 |
| 64 | 932.25000 | 2.626e+05 | 2.682e+05 | -5569.375 | -2.120754 | 2.665e+05 | 2.699e+05 | 2.636e+05 | 2.727e+05 | 1 |
| 65 | 932.50000 | 2.553e+05 | 2.58e+05  | -2776.952 | -1.087853 | 2.563e+05 | 2.598e+05 | 2.535e+05 | 2.626e+05 | 1 |
| 66 | 932.75000 | 2.482e+05 | 2.486e+05 | -338.1782 | -0.136246 | 2.468e+05 | 2.503e+05 | 2.44e+05  | 2.531e+05 | 1 |
| 67 | 933.00000 | 2.435e+05 | 2.405e+05 | 2979.5790 | 1.2238877 | 2.389e+05 | 2.42e+05  | 2.36e+05  | 2.45e+05  | 1 |
| 68 | 933.25000 | 2.39e+05  | 2.342e+05 | 4803.4721 | 2.0100144 | 2.329e+05 | 2.355e+05 | 2.298e+05 | 2.386e+05 | 1 |
| 69 | 933.50000 | 2.352e+05 | 2.297e+05 | 5587.9392 | 2.3753902 | 2.286e+05 | 2.307e+05 | 2.253e+05 | 2.34e+05  | 1 |
| 70 | 933.75000 | 2.318e+05 | 2.267e+05 | 5070.5262 | 2.1879293 | 2.258e+05 | 2.275e+05 | 2.224e+05 | 2.31e+05  | 1 |
| 71 | 934.00000 | 2.297e+05 | 2.249e+05 | 4835.5268 | 2.1048189 | 2.242e+05 | 2.256e+05 | 2.206e+05 | 2.292e+05 | 1 |
| 72 | 934.25000 | 2.289e+05 | 2.24e+05  | 4887.8388 | 2.1357891 | 2.233e+05 | 2.246e+05 | 2.197e+05 | 2.282e+05 | 1 |
| 73 | 934.50000 | 2.27e+05  | 2.236e+05 | 3438.0270 | 1.5144293 | 2.229e+05 | 2.242e+05 | 2.193e+05 | 2.279e+05 | 1 |
| 74 | 934.75000 | 2.268e+05 | 2.235e+05 | 3277.1872 | 1.4449679 | 2.229e+05 | 2.242e+05 | 2.193e+05 | 2.278e+05 | 1 |
| 75 | 935.00000 | 2.264e+05 | 2.236e+05 | 2740.8500 | 1.2106763 | 2.23e+05  | 2.243e+05 | 2.194e+05 | 2.279e+05 | 1 |
| 76 | 935.25000 | 2.262e+05 | 2.239e+05 | 2366.1434 | 1.0458693 | 2.232e+05 | 2.246e+05 | 2.196e+05 | 2.281e+05 | 1 |

|     |           |           |           |           |           |           |           |           |           |   |
|-----|-----------|-----------|-----------|-----------|-----------|-----------|-----------|-----------|-----------|---|
| 77  | 935.50000 | 2.251e+05 | 2.241e+05 | 1003.1388 | 0.4455583 | 2.235e+05 | 2.248e+05 | 2.199e+05 | 2.284e+05 | 1 |
| 78  | 935.75000 | 2.243e+05 | 2.244e+05 | -88.89657 | -0.039626 | 2.238e+05 | 2.251e+05 | 2.202e+05 | 2.287e+05 | 1 |
| 79  | 936.00000 | 2.252e+05 | 2.247e+05 | 457.11700 | 0.2029980 | 2.241e+05 | 2.254e+05 | 2.205e+05 | 2.29e+05  | 1 |
| 80  | 936.25000 | 2.247e+05 | 2.25e+05  | -308.4430 | -0.137257 | 2.244e+05 | 2.257e+05 | 2.208e+05 | 2.293e+05 | 1 |
| 81  | 936.50000 | 2.255e+05 | 2.253e+05 | 150.65742 | 0.0668160 | 2.247e+05 | 2.26e+05  | 2.211e+05 | 2.296e+05 | 1 |
| 82  | 936.75000 | 2.257e+05 | 2.256e+05 | 113.28617 | 0.0501828 | 2.25e+05  | 2.263e+05 | 2.214e+05 | 2.299e+05 | 1 |
| 83  | 937.00000 | 2.249e+05 | 2.259e+05 | -1050.241 | -0.467008 | 2.253e+05 | 2.266e+05 | 2.217e+05 | 2.302e+05 | 1 |
| 84  | 937.25000 | 2.246e+05 | 2.262e+05 | -1681.817 | -0.748942 | 2.256e+05 | 2.269e+05 | 2.22e+05  | 2.305e+05 | 1 |
| 85  | 937.50000 | 2.246e+05 | 2.265e+05 | -1905.408 | -0.848209 | 2.259e+05 | 2.272e+05 | 2.223e+05 | 2.308e+05 | 1 |
| 86  | 937.75000 | 2.254e+05 | 2.268e+05 | -1414.002 | -0.627235 | 2.262e+05 | 2.275e+05 | 2.226e+05 | 2.311e+05 | 1 |
| 87  | 938.00000 | 2.253e+05 | 2.272e+05 | -1898.597 | -0.842873 | 2.265e+05 | 2.278e+05 | 2.229e+05 | 2.314e+05 | 1 |
| 88  | 938.25000 | 2.254e+05 | 2.275e+05 | -2015.193 | -0.893893 | 2.268e+05 | 2.281e+05 | 2.232e+05 | 2.317e+05 | 1 |
| 89  | 938.50000 | 2.256e+05 | 2.278e+05 | -2132.788 | -0.945276 | 2.272e+05 | 2.284e+05 | 2.235e+05 | 2.32e+05  | 1 |
| 90  | 938.75000 | 2.263e+05 | 2.281e+05 | -1780.384 | -0.786799 | 2.275e+05 | 2.287e+05 | 2.238e+05 | 2.323e+05 | 1 |
| 91  | 939.00000 | 2.268e+05 | 2.284e+05 | -1581.979 | -0.697571 | 2.278e+05 | 2.29e+05  | 2.241e+05 | 2.326e+05 | 1 |
| 92  | 939.25000 | 2.271e+05 | 2.287e+05 | -1538.575 | -0.677395 | 2.281e+05 | 2.293e+05 | 2.244e+05 | 2.329e+05 | 1 |
| 93  | 939.50000 | 2.274e+05 | 2.29e+05  | -1601.171 | -0.704207 | 2.284e+05 | 2.295e+05 | 2.247e+05 | 2.332e+05 | 1 |
| 94  | 939.75000 | 2.274e+05 | 2.293e+05 | -1833.766 | -0.806253 | 2.287e+05 | 2.298e+05 | 2.25e+05  | 2.335e+05 | 1 |
| 95  | 940.00000 | 2.277e+05 | 2.296e+05 | -1857.362 | -0.815623 | 2.29e+05  | 2.301e+05 | 2.253e+05 | 2.338e+05 | 1 |
| 96  | 940.25000 | 2.277e+05 | 2.299e+05 | -2168.957 | -0.952488 | 2.293e+05 | 2.304e+05 | 2.256e+05 | 2.341e+05 | 1 |
| 97  | 940.50000 | 2.29e+05  | 2.302e+05 | -1232.553 | -0.538339 | 2.296e+05 | 2.307e+05 | 2.259e+05 | 2.344e+05 | 1 |
| 98  | 940.75000 | 2.295e+05 | 2.305e+05 | -972.1486 | -0.423559 | 2.299e+05 | 2.31e+05  | 2.262e+05 | 2.347e+05 | 1 |
| 99  | 941.00000 | 2.301e+05 | 2.308e+05 | -706.7442 | -0.307163 | 2.303e+05 | 2.313e+05 | 2.265e+05 | 2.35e+05  | 1 |
| 100 | 941.25000 | 2.31e+05  | 2.311e+05 | -128.3397 | -0.055566 | 2.306e+05 | 2.316e+05 | 2.268e+05 | 2.354e+05 | 1 |
| 101 | 941.50000 | 2.314e+05 | 2.314e+05 | -9.935337 | -0.004294 | 2.309e+05 | 2.319e+05 | 2.272e+05 | 2.357e+05 | 1 |
| 102 | 941.75000 | 2.318e+05 | 2.317e+05 | 90.469072 | 0.0390296 | 2.312e+05 | 2.322e+05 | 2.275e+05 | 2.36e+05  | 1 |
| 103 | 942.00000 | 2.316e+05 | 2.32e+05  | -430.1265 | -0.185736 | 2.315e+05 | 2.325e+05 | 2.278e+05 | 2.363e+05 | 1 |
| 104 | 942.25000 | 2.328e+05 | 2.323e+05 | 477.27789 | 0.2050251 | 2.318e+05 | 2.328e+05 | 2.281e+05 | 2.366e+05 | 1 |
| 105 | 942.50000 | 2.321e+05 | 2.326e+05 | -529.3177 | -0.228069 | 2.321e+05 | 2.331e+05 | 2.284e+05 | 2.369e+05 | 1 |
| 106 | 942.75000 | 2.321e+05 | 2.329e+05 | -842.9133 | -0.363204 | 2.324e+05 | 2.334e+05 | 2.287e+05 | 2.372e+05 | 1 |
| 107 | 943.00000 | 2.328e+05 | 2.332e+05 | -440.5089 | -0.189236 | 2.327e+05 | 2.337e+05 | 2.29e+05  | 2.375e+05 | 1 |
| 108 | 943.25000 | 2.333e+05 | 2.335e+05 | -189.1045 | -0.081043 | 2.33e+05  | 2.34e+05  | 2.293e+05 | 2.378e+05 | 1 |
| 109 | 943.50000 | 2.337e+05 | 2.338e+05 | -127.7001 | -0.054642 | 2.333e+05 | 2.343e+05 | 2.296e+05 | 2.381e+05 | 1 |
| 110 | 943.75000 | 2.334e+05 | 2.341e+05 | -696.2957 | -0.298279 | 2.337e+05 | 2.346e+05 | 2.299e+05 | 2.384e+05 | 1 |
| 111 | 944.00000 | 2.336e+05 | 2.344e+05 | -824.8913 | -0.353102 | 2.34e+05  | 2.349e+05 | 2.302e+05 | 2.387e+05 | 1 |
| 112 | 944.25000 | 2.346e+05 | 2.347e+05 | -119.4869 | -0.050927 | 2.343e+05 | 2.352e+05 | 2.305e+05 | 2.39e+05  | 1 |
| 113 | 944.50000 | 2.353e+05 | 2.35e+05  | 275.91751 | 0.1172515 | 2.346e+05 | 2.355e+05 | 2.308e+05 | 2.393e+05 | 1 |
| 114 | 944.75000 | 2.357e+05 | 2.353e+05 | 312.32171 | 0.1325301 | 2.349e+05 | 2.358e+05 | 2.311e+05 | 2.396e+05 | 1 |
| 115 | 945.00000 | 2.361e+05 | 2.357e+05 | 403.72529 | 0.1710295 | 2.352e+05 | 2.361e+05 | 2.314e+05 | 2.399e+05 | 1 |

|     |           |           |           |           |           |           |           |           |           |   |
|-----|-----------|-----------|-----------|-----------|-----------|-----------|-----------|-----------|-----------|---|
| 116 | 945.25000 | 2.365e+05 | 2.36e+05  | 535.12648 | 0.2262777 | 2.355e+05 | 2.364e+05 | 2.317e+05 | 2.402e+05 | 1 |
| 117 | 945.50000 | 2.364e+05 | 2.363e+05 | 137.51915 | 0.0581730 | 2.358e+05 | 2.367e+05 | 2.32e+05  | 2.405e+05 | 1 |
| 118 | 945.75000 | 2.367e+05 | 2.366e+05 | 104.88316 | 0.0443166 | 2.361e+05 | 2.37e+05  | 2.323e+05 | 2.408e+05 | 1 |
| 119 | 946.00000 | 2.368e+05 | 2.369e+05 | -105.8435 | -0.044705 | 2.364e+05 | 2.373e+05 | 2.326e+05 | 2.411e+05 | 1 |
| 120 | 946.25000 | 2.373e+05 | 2.372e+05 | 165.15986 | 0.0695890 | 2.367e+05 | 2.376e+05 | 2.329e+05 | 2.414e+05 | 1 |
| 121 | 946.50000 | 2.381e+05 | 2.375e+05 | 608.40808 | 0.2555435 | 2.37e+05  | 2.379e+05 | 2.332e+05 | 2.417e+05 | 1 |
| 122 | 946.75000 | 2.383e+05 | 2.378e+05 | 499.67171 | 0.2096976 | 2.374e+05 | 2.382e+05 | 2.335e+05 | 2.42e+05  | 1 |
| 123 | 947.00000 | 2.384e+05 | 2.381e+05 | 331.03962 | 0.1388443 | 2.377e+05 | 2.385e+05 | 2.339e+05 | 2.423e+05 | 1 |
| 124 | 947.25000 | 2.381e+05 | 2.384e+05 | -311.9182 | -0.131000 | 2.38e+05  | 2.388e+05 | 2.342e+05 | 2.427e+05 | 1 |
| 125 | 947.50000 | 2.391e+05 | 2.388e+05 | 291.58184 | 0.1219722 | 2.384e+05 | 2.392e+05 | 2.345e+05 | 2.43e+05  | 1 |
| 126 | 947.75000 | 2.405e+05 | 2.392e+05 | 1383.3385 | 0.5750851 | 2.388e+05 | 2.396e+05 | 2.349e+05 | 2.434e+05 | 1 |
| 127 | 948.00000 | 2.406e+05 | 2.397e+05 | 902.96753 | 0.3753669 | 2.393e+05 | 2.4e+05   | 2.354e+05 | 2.439e+05 | 1 |
| 128 | 948.25000 | 2.417e+05 | 2.403e+05 | 1410.7153 | 0.5836131 | 2.399e+05 | 2.407e+05 | 2.361e+05 | 2.445e+05 | 1 |
| 129 | 948.50000 | 2.419e+05 | 2.412e+05 | 696.11334 | 0.2877274 | 2.408e+05 | 2.417e+05 | 2.37e+05  | 2.455e+05 | 1 |
| 130 | 948.75000 | 2.434e+05 | 2.426e+05 | 791.42630 | 0.3251960 | 2.42e+05  | 2.431e+05 | 2.383e+05 | 2.468e+05 | 1 |
| 131 | 949.00000 | 2.45e+05  | 2.445e+05 | 521.15176 | 0.2127098 | 2.437e+05 | 2.452e+05 | 2.402e+05 | 2.488e+05 | 1 |
| 132 | 949.25000 | 2.473e+05 | 2.471e+05 | 162.61075 | 0.0657624 | 2.461e+05 | 2.481e+05 | 2.428e+05 | 2.514e+05 | 1 |
| 133 | 949.50000 | 2.503e+05 | 2.505e+05 | -201.4848 | -0.080488 | 2.493e+05 | 2.518e+05 | 2.461e+05 | 2.549e+05 | 1 |
| 134 | 949.75000 | 2.544e+05 | 2.547e+05 | -280.4946 | -0.110240 | 2.533e+05 | 2.562e+05 | 2.503e+05 | 2.592e+05 | 1 |
| 135 | 950.00000 | 2.597e+05 | 2.595e+05 | 249.94982 | 0.0962378 | 2.579e+05 | 2.611e+05 | 2.55e+05  | 2.64e+05  | 1 |
| 136 | 950.25000 | 2.651e+05 | 2.644e+05 | 720.11592 | 0.2716209 | 2.627e+05 | 2.661e+05 | 2.599e+05 | 2.689e+05 | 1 |
| 137 | 950.50000 | 2.701e+05 | 2.69e+05  | 1119.4878 | 0.4144931 | 2.673e+05 | 2.707e+05 | 2.644e+05 | 2.735e+05 | 1 |
| 138 | 950.75000 | 2.741e+05 | 2.726e+05 | 1490.1246 | 0.5436804 | 2.709e+05 | 2.743e+05 | 2.681e+05 | 2.771e+05 | 1 |
| 139 | 951.00000 | 2.753e+05 | 2.748e+05 | 565.74423 | 0.2054801 | 2.731e+05 | 2.764e+05 | 2.702e+05 | 2.793e+05 | 1 |
| 140 | 951.25000 | 2.74e+05  | 2.752e+05 | -1152.594 | -0.420618 | 2.736e+05 | 2.768e+05 | 2.707e+05 | 2.797e+05 | 1 |
| 141 | 951.50000 | 2.721e+05 | 2.738e+05 | -1713.481 | -0.629720 | 2.722e+05 | 2.755e+05 | 2.693e+05 | 2.783e+05 | 1 |
| 142 | 951.75000 | 2.686e+05 | 2.71e+05  | -2339.162 | -0.870833 | 2.693e+05 | 2.727e+05 | 2.664e+05 | 2.755e+05 | 1 |
| 143 | 952.00000 | 2.652e+05 | 2.671e+05 | -1879.692 | -0.708799 | 2.654e+05 | 2.688e+05 | 2.625e+05 | 2.716e+05 | 1 |
| 144 | 952.25000 | 2.621e+05 | 2.628e+05 | -670.0231 | -0.255639 | 2.611e+05 | 2.644e+05 | 2.582e+05 | 2.673e+05 | 1 |
| 145 | 952.50000 | 2.592e+05 | 2.586e+05 | 579.93871 | 0.2237789 | 2.571e+05 | 2.601e+05 | 2.541e+05 | 2.63e+05  | 1 |
| 146 | 952.75000 | 2.574e+05 | 2.549e+05 | 2442.9148 | 0.9492393 | 2.536e+05 | 2.562e+05 | 2.505e+05 | 2.593e+05 | 1 |
| 147 | 953.00000 | 2.556e+05 | 2.52e+05  | 3610.0170 | 1.4123255 | 2.51e+05  | 2.53e+05  | 2.477e+05 | 2.563e+05 | 1 |
| 148 | 953.25000 | 2.54e+05  | 2.499e+05 | 4066.2093 | 1.6011598 | 2.491e+05 | 2.507e+05 | 2.456e+05 | 2.542e+05 | 1 |
| 149 | 953.50000 | 2.524e+05 | 2.485e+05 | 3930.3120 | 1.5569415 | 2.479e+05 | 2.491e+05 | 2.442e+05 | 2.528e+05 | 1 |
| 150 | 953.75000 | 2.513e+05 | 2.477e+05 | 3611.4801 | 1.4369646 | 2.472e+05 | 2.482e+05 | 2.435e+05 | 2.52e+05  | 1 |
| 151 | 954.00000 | 2.504e+05 | 2.474e+05 | 3063.8556 | 1.2235063 | 2.469e+05 | 2.478e+05 | 2.431e+05 | 2.516e+05 | 1 |
| 152 | 954.25000 | 2.501e+05 | 2.473e+05 | 2817.6321 | 1.1266337 | 2.469e+05 | 2.477e+05 | 2.43e+05  | 2.515e+05 | 1 |
| 153 | 954.50000 | 2.504e+05 | 2.474e+05 | 2998.5570 | 1.1976311 | 2.47e+05  | 2.478e+05 | 2.431e+05 | 2.516e+05 | 1 |
| 154 | 954.75000 | 2.493e+05 | 2.476e+05 | 1705.2344 | 0.6840584 | 2.472e+05 | 2.48e+05  | 2.433e+05 | 2.518e+05 | 1 |

|     |           |           |           |           |           |           |           |           |           |   |
|-----|-----------|-----------|-----------|-----------|-----------|-----------|-----------|-----------|-----------|---|
| 155 | 955.00000 | 2.494e+05 | 2.478e+05 | 1566.9478 | 0.6282895 | 2.474e+05 | 2.482e+05 | 2.436e+05 | 2.521e+05 | 1 |
| 156 | 955.25000 | 2.49e+05  | 2.481e+05 | 849.81552 | 0.3413407 | 2.477e+05 | 2.485e+05 | 2.439e+05 | 2.524e+05 | 1 |
| 157 | 955.50000 | 2.49e+05  | 2.484e+05 | 584.19438 | 0.2346228 | 2.48e+05  | 2.488e+05 | 2.442e+05 | 2.526e+05 | 1 |
| 158 | 955.75000 | 2.49e+05  | 2.487e+05 | 302.13189 | 0.1213327 | 2.483e+05 | 2.491e+05 | 2.445e+05 | 2.529e+05 | 1 |
| 159 | 956.00000 | 2.492e+05 | 2.49e+05  | 144.84640 | 0.0581348 | 2.486e+05 | 2.494e+05 | 2.448e+05 | 2.533e+05 | 1 |
| 160 | 956.25000 | 2.495e+05 | 2.493e+05 | 224.70852 | 0.0900495 | 2.489e+05 | 2.497e+05 | 2.451e+05 | 2.536e+05 | 1 |
| 161 | 956.50000 | 2.492e+05 | 2.496e+05 | -411.7364 | -0.165219 | 2.492e+05 | 2.5e+05   | 2.454e+05 | 2.539e+05 | 1 |
| 162 | 956.75000 | 2.495e+05 | 2.499e+05 | -417.2852 | -0.167246 | 2.495e+05 | 2.504e+05 | 2.457e+05 | 2.542e+05 | 1 |
| 163 | 957.00000 | 2.495e+05 | 2.502e+05 | -767.8671 | -0.307815 | 2.498e+05 | 2.507e+05 | 2.46e+05  | 2.545e+05 | 1 |
| 164 | 957.25000 | 2.491e+05 | 2.505e+05 | -1379.459 | -0.553668 | 2.501e+05 | 2.51e+05  | 2.463e+05 | 2.548e+05 | 1 |
| 165 | 957.50000 | 2.495e+05 | 2.508e+05 | -1335.054 | -0.535098 | 2.504e+05 | 2.513e+05 | 2.466e+05 | 2.551e+05 | 1 |
| 166 | 957.75000 | 2.5e+05   | 2.511e+05 | -1117.649 | -0.447027 | 2.507e+05 | 2.516e+05 | 2.469e+05 | 2.554e+05 | 1 |
| 167 | 958.00000 | 2.49e+05  | 2.514e+05 | -2468.244 | -0.991378 | 2.51e+05  | 2.519e+05 | 2.472e+05 | 2.557e+05 | 1 |
| 168 | 958.25000 | 2.492e+05 | 2.517e+05 | -2578.840 | -1.034997 | 2.513e+05 | 2.522e+05 | 2.475e+05 | 2.56e+05  | 1 |
| 169 | 958.50000 | 2.502e+05 | 2.52e+05  | -1872.436 | -0.748453 | 2.516e+05 | 2.525e+05 | 2.478e+05 | 2.563e+05 | 1 |
| 170 | 958.75000 | 2.499e+05 | 2.524e+05 | -2401.031 | -0.960608 | 2.519e+05 | 2.528e+05 | 2.481e+05 | 2.566e+05 | 1 |
| 171 | 959.00000 | 2.499e+05 | 2.527e+05 | -2705.627 | -1.082476 | 2.522e+05 | 2.531e+05 | 2.484e+05 | 2.569e+05 | 1 |
| 172 | 959.25000 | 2.502e+05 | 2.53e+05  | -2796.222 | -1.117769 | 2.525e+05 | 2.534e+05 | 2.487e+05 | 2.572e+05 | 1 |
| 173 | 959.50000 | 2.498e+05 | 2.533e+05 | -3428.818 | -1.372449 | 2.528e+05 | 2.537e+05 | 2.49e+05  | 2.575e+05 | 1 |
| 174 | 959.75000 | 2.499e+05 | 2.536e+05 | -3657.414 | -1.463510 | 2.531e+05 | 2.541e+05 | 2.493e+05 | 2.578e+05 | 1 |
| 175 | 960.00000 | 2.506e+05 | 2.539e+05 | -3282.009 | -1.309734 | 2.534e+05 | 2.544e+05 | 2.496e+05 | 2.581e+05 | 1 |
| 176 | 960.25000 | 2.502e+05 | 2.542e+05 | -3943.605 | -1.576005 | 2.537e+05 | 2.547e+05 | 2.499e+05 | 2.584e+05 | 1 |
| 177 | 960.50000 | 2.505e+05 | 2.545e+05 | -3960.200 | -1.580824 | 2.54e+05  | 2.55e+05  | 2.502e+05 | 2.587e+05 | 1 |
| 178 | 960.75000 | 2.516e+05 | 2.548e+05 | -3132.796 | -1.244922 | 2.543e+05 | 2.553e+05 | 2.505e+05 | 2.59e+05  | 1 |
| 179 | 961.00000 | 2.523e+05 | 2.551e+05 | -2764.391 | -1.095598 | 2.546e+05 | 2.556e+05 | 2.508e+05 | 2.593e+05 | 1 |
| 180 | 961.25000 | 2.525e+05 | 2.554e+05 | -2900.987 | -1.148974 | 2.549e+05 | 2.559e+05 | 2.511e+05 | 2.596e+05 | 1 |
| 181 | 961.50000 | 2.53e+05  | 2.557e+05 | -2718.583 | -1.074662 | 2.552e+05 | 2.562e+05 | 2.514e+05 | 2.599e+05 | 1 |
| 182 | 961.75000 | 2.536e+05 | 2.56e+05  | -2413.178 | -0.951644 | 2.555e+05 | 2.565e+05 | 2.517e+05 | 2.602e+05 | 1 |
| 183 | 962.00000 | 2.548e+05 | 2.563e+05 | -1449.774 | -0.568880 | 2.558e+05 | 2.568e+05 | 2.52e+05  | 2.606e+05 | 1 |
| 184 | 962.25000 | 2.545e+05 | 2.566e+05 | -2137.369 | -0.839953 | 2.561e+05 | 2.571e+05 | 2.523e+05 | 2.609e+05 | 1 |
| 185 | 962.50000 | 2.549e+05 | 2.569e+05 | -1957.965 | -0.767992 | 2.563e+05 | 2.575e+05 | 2.526e+05 | 2.612e+05 | 1 |
| 186 | 962.75000 | 2.553e+05 | 2.572e+05 | -1886.561 | -0.738898 | 2.566e+05 | 2.578e+05 | 2.53e+05  | 2.615e+05 | 1 |
| 187 | 963.00000 | 2.56e+05  | 2.575e+05 | -1533.156 | -0.598941 | 2.569e+05 | 2.581e+05 | 2.533e+05 | 2.618e+05 | 1 |
| 188 | 963.25000 | 2.569e+05 | 2.578e+05 | -930.7518 | -0.362324 | 2.572e+05 | 2.584e+05 | 2.536e+05 | 2.621e+05 | 1 |
| 189 | 963.50000 | 2.574e+05 | 2.581e+05 | -672.3474 | -0.261161 | 2.575e+05 | 2.587e+05 | 2.539e+05 | 2.624e+05 | 1 |
| 190 | 963.75000 | 2.577e+05 | 2.584e+05 | -726.9430 | -0.282094 | 2.578e+05 | 2.59e+05  | 2.542e+05 | 2.627e+05 | 1 |
| 191 | 964.00000 | 2.583e+05 | 2.587e+05 | -376.5387 | -0.145748 | 2.581e+05 | 2.593e+05 | 2.545e+05 | 2.63e+05  | 1 |
| 192 | 964.25000 | 2.59e+05  | 2.59e+05  | -29.13465 | -0.011249 | 2.584e+05 | 2.596e+05 | 2.548e+05 | 2.633e+05 | 1 |
| 193 | 964.50000 | 2.593e+05 | 2.593e+05 | -66.73167 | -0.025739 | 2.587e+05 | 2.599e+05 | 2.551e+05 | 2.636e+05 | 1 |

|     |           |           |           |           |           |           |           |           |           |   |
|-----|-----------|-----------|-----------|-----------|-----------|-----------|-----------|-----------|-----------|---|
| 194 | 964.75000 | 2.6e+05   | 2.596e+05 | 388.66763 | 0.1494732 | 2.59e+05  | 2.603e+05 | 2.554e+05 | 2.639e+05 | 1 |
| 195 | 965.00000 | 2.604e+05 | 2.599e+05 | 451.05475 | 0.1732221 | 2.593e+05 | 2.606e+05 | 2.557e+05 | 2.642e+05 | 1 |
| 196 | 965.25000 | 2.609e+05 | 2.602e+05 | 611.40402 | 0.2343846 | 2.596e+05 | 2.609e+05 | 2.56e+05  | 2.645e+05 | 1 |
| 197 | 965.50000 | 2.608e+05 | 2.605e+05 | 282.64264 | 0.1083628 | 2.599e+05 | 2.612e+05 | 2.563e+05 | 2.648e+05 | 1 |
| 198 | 965.75000 | 2.617e+05 | 2.609e+05 | 844.57729 | 0.3227322 | 2.602e+05 | 2.615e+05 | 2.566e+05 | 2.651e+05 | 1 |
| 199 | 966.00000 | 2.619e+05 | 2.612e+05 | 746.72766 | 0.2851161 | 2.605e+05 | 2.618e+05 | 2.569e+05 | 2.654e+05 | 1 |
| 200 | 966.25000 | 2.634e+05 | 2.615e+05 | 1913.9791 | 0.7267070 | 2.608e+05 | 2.621e+05 | 2.572e+05 | 2.657e+05 | 1 |
| 201 | 966.50000 | 2.633e+05 | 2.618e+05 | 1476.9200 | 0.5610311 | 2.611e+05 | 2.624e+05 | 2.575e+05 | 2.66e+05  | 1 |
| 202 | 966.75000 | 2.647e+05 | 2.621e+05 | 2588.6992 | 0.9780376 | 2.614e+05 | 2.628e+05 | 2.578e+05 | 2.664e+05 | 1 |
| 203 | 967.00000 | 2.653e+05 | 2.624e+05 | 2834.2742 | 1.0684609 | 2.618e+05 | 2.631e+05 | 2.582e+05 | 2.667e+05 | 1 |
| 204 | 967.25000 | 2.653e+05 | 2.628e+05 | 2496.1005 | 0.9408560 | 2.621e+05 | 2.635e+05 | 2.585e+05 | 2.671e+05 | 1 |
| 205 | 967.50000 | 2.658e+05 | 2.632e+05 | 2566.7084 | 0.9656467 | 2.626e+05 | 2.639e+05 | 2.59e+05  | 2.675e+05 | 1 |
| 206 | 967.75000 | 2.676e+05 | 2.638e+05 | 3880.2062 | 1.4497910 | 2.631e+05 | 2.645e+05 | 2.595e+05 | 2.68e+05  | 1 |
| 207 | 968.00000 | 2.678e+05 | 2.644e+05 | 3416.3676 | 1.2755446 | 2.637e+05 | 2.652e+05 | 2.601e+05 | 2.687e+05 | 1 |
| 208 | 968.25000 | 2.684e+05 | 2.653e+05 | 3103.1831 | 1.1563121 | 2.644e+05 | 2.661e+05 | 2.61e+05  | 2.696e+05 | 1 |
| 209 | 968.50000 | 2.695e+05 | 2.663e+05 | 3144.0770 | 1.1667113 | 2.653e+05 | 2.674e+05 | 2.62e+05  | 2.707e+05 | 1 |
| 210 | 968.75000 | 2.697e+05 | 2.677e+05 | 2023.0651 | 0.7501836 | 2.664e+05 | 2.689e+05 | 2.632e+05 | 2.721e+05 | 1 |
| 211 | 969.00000 | 2.697e+05 | 2.692e+05 | 529.24671 | 0.1962237 | 2.677e+05 | 2.707e+05 | 2.647e+05 | 2.737e+05 | 1 |
| 212 | 969.25000 | 2.717e+05 | 2.709e+05 | 823.30980 | 0.3030384 | 2.692e+05 | 2.725e+05 | 2.663e+05 | 2.754e+05 | 1 |
| 213 | 969.50000 | 2.717e+05 | 2.725e+05 | -875.1037 | -0.322119 | 2.708e+05 | 2.743e+05 | 2.68e+05  | 2.771e+05 | 1 |
| 214 | 969.75000 | 2.727e+05 | 2.741e+05 | -1337.885 | -0.490547 | 2.724e+05 | 2.758e+05 | 2.695e+05 | 2.786e+05 | 1 |
| 215 | 970.00000 | 2.739e+05 | 2.753e+05 | -1394.818 | -0.509305 | 2.736e+05 | 2.769e+05 | 2.707e+05 | 2.798e+05 | 1 |
| 216 | 970.25000 | 2.736e+05 | 2.76e+05  | -2383.917 | -0.871327 | 2.744e+05 | 2.776e+05 | 2.715e+05 | 2.805e+05 | 1 |
| 217 | 970.50000 | 2.744e+05 | 2.762e+05 | -1761.023 | -0.641782 | 2.745e+05 | 2.778e+05 | 2.716e+05 | 2.807e+05 | 1 |
| 218 | 970.75000 | 2.753e+05 | 2.758e+05 | -518.1448 | -0.188214 | 2.74e+05  | 2.776e+05 | 2.712e+05 | 2.804e+05 | 1 |
| 219 | 971.00000 | 2.767e+05 | 2.751e+05 | 1604.2523 | 0.5798642 | 2.732e+05 | 2.77e+05  | 2.704e+05 | 2.797e+05 | 1 |
| 220 | 971.25000 | 2.762e+05 | 2.74e+05  | 2202.8655 | 0.7974318 | 2.721e+05 | 2.76e+05  | 2.694e+05 | 2.787e+05 | 1 |
| 221 | 971.50000 | 2.763e+05 | 2.729e+05 | 3396.0497 | 1.2289122 | 2.711e+05 | 2.748e+05 | 2.684e+05 | 2.775e+05 | 1 |
